# Supplementary material for: A nano CoFe2O4 entangled CMC/psyllium/RGO (CPRHG/CF)-based hydrogel composite for the adsorption & photocatalytic removal of pharmaceutical effluent: tramadol
Source: Royal Society of Chemistry journal article supplement (doi:10.1039/d4nj00917g), 2024-01-01
Supplement: d4nj00917g1.pdf [file d4nj00917g1.pdf]

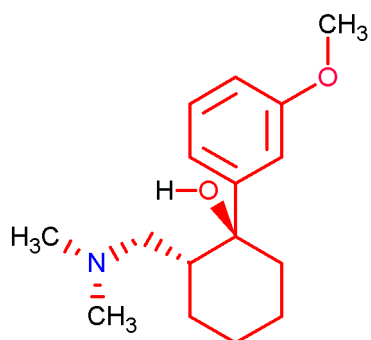

Fig. S1: Chemical structure of tramadol

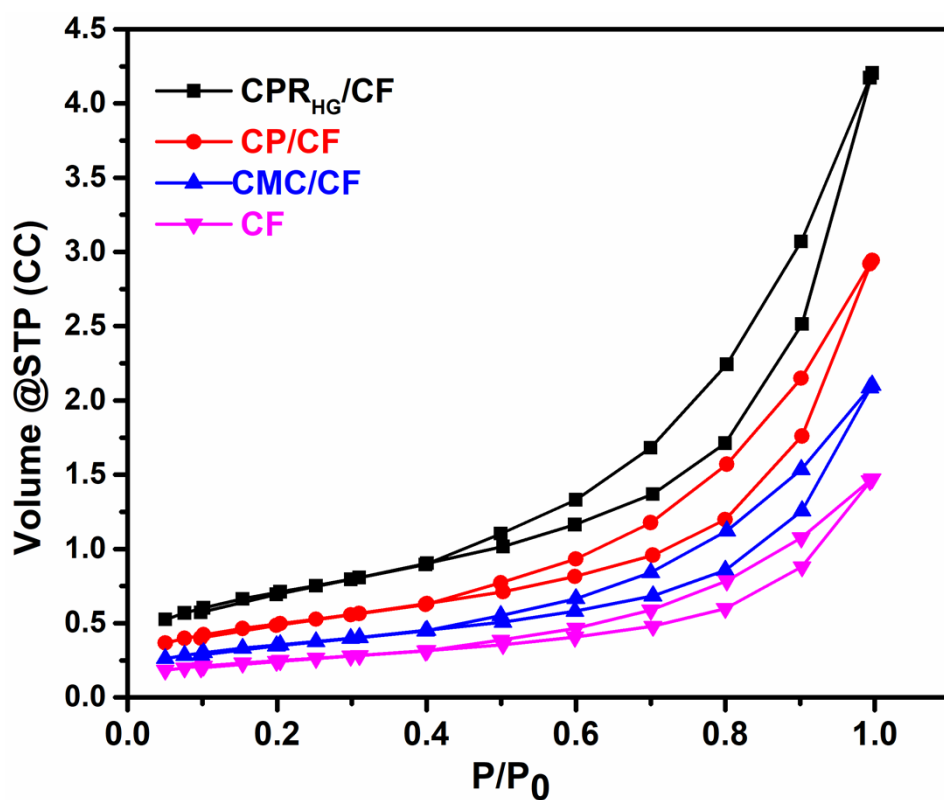

Fig.S2: N<sub>2</sub> adsorption-desorption curves for the CPR<sub>HG</sub>/CF and its counterparts
